# Supplementary material for: In situ high temperature powder neutron diffraction study of undoped and Ca-doped La28−xW4+xO54+3x/2(x = 0.85)
Source: Royal Society of Chemistry journal article supplement (doi:10.1039/c3ta00497j), 2013-01-11
Supplement: c3ta00497j.pdf [file c3ta00497j.pdf]

**Supplementary information**

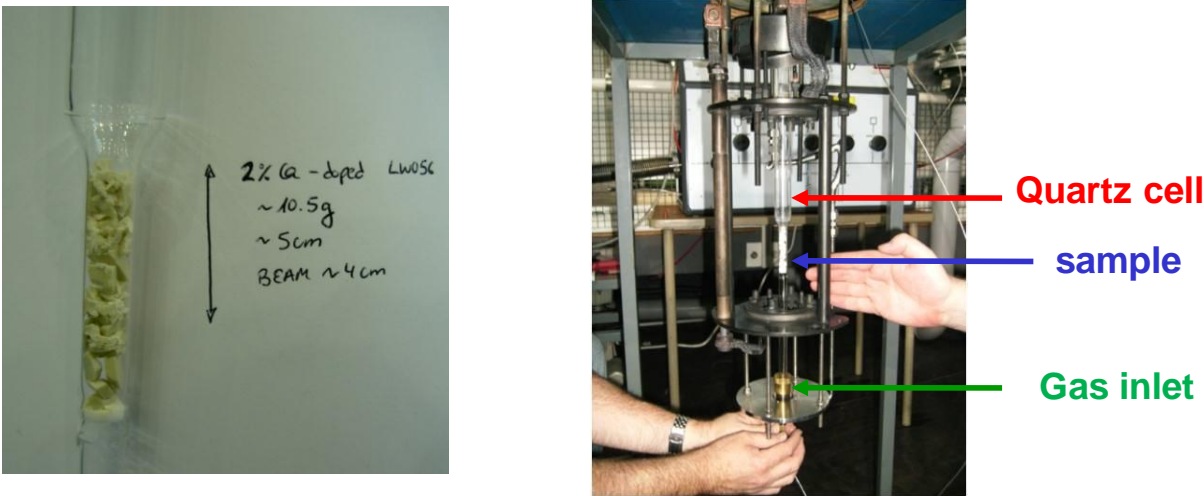

**Figure S1.** The setup used in POLARIS is special in this experiment, because it can control temperature ( $T \approx 300\text{--}800\text{ }^{\circ}\text{C}$ ), control  $p\text{O}_2$  (in our case, it is Ar) and control  $p\text{D}_2\text{O}$  (by bubbling through a  $\text{D}_2\text{O}$  bath under controlled temperature, which then determines the  $p\text{D}_2\text{O}$ ). In order to avoid condensation of water after the  $\text{D}_2\text{O}$  bath (leading to uncontrolled  $p\text{D}_2\text{O}$ ), a heating cable surrounded the gas tubes from the  $\text{D}_2\text{O}$  bath until the cell. The image on the left shows the quartz cell with the Ca-doped LWO56.

**Table S1.** The microanalysis of the sintered bodies was measured by EPMA (electron probe microanalysis) using the same equipment as reference [5]. No significant deviation from the nominal cation ratio is measured:

| Sample name<br>(internal reference) | LWO 30.2A | LWO 31.3D |        |
|-------------------------------------|-----------|-----------|--------|
|                                     | La/W      | La/W      | Ca/La  |
| ratio average                       | 5.65      | 5.49      | 0.0200 |
| $2\sigma_{\text{st}}$ (95%)         | 0.07      | 0.08      | 0.0010 |
| ratio nominal                       | 5.6       | 5.49      | 0.0206 |

**Table S2.** Clarification of the nomenclature and small description of the coordination environment of each cation in the  $Fm\bar{3}m$  space group and  $F\bar{4}3m$  space group:

| atom | Wyckoff position | surrounded by        | comments and descriptions                                                                                                                                                                                                      |
|------|------------------|----------------------|--------------------------------------------------------------------------------------------------------------------------------------------------------------------------------------------------------------------------------|
| La1  | (4a)             | O1                   | relatively symmetric $\text{LaO}_8$ cube                                                                                                                                                                                       |
|      | (4a)             | O1a, O1b             |                                                                                                                                                                                                                                |
| La2  | (24d)            | O1, O2               | distorted $\text{LaO}_8$ cube<br>Links (La1) $\text{O}_8$ cubes with (W1) $\text{O}_8$ “cubes”                                                                                                                                 |
|      | (24g)            | O1a, O1b<br>O2a, O2b |                                                                                                                                                                                                                                |
| W1   | (4b)             | O2                   | In average (by diffraction techniques) it can be represented as $\text{WO}_8$ “cubes”, but the local structure reveals it is octahedral $\text{WO}_6$ , disordered in space and time, which average out as “cubes”.            |
|      | (4b)             | O2a, O2b             |                                                                                                                                                                                                                                |
| W2   | (24d)            | same as La2          | This is the tungsten that dissolves in La2 sites (not in La1 sites), and can be written as $\text{W}_{\text{La}}$ or more specifically, $\text{W}_{\text{La}2}$ or even $\text{W2}_{\text{La}2}$ , to highlight where it sits. |
|      | (24g)            |                      |                                                                                                                                                                                                                                |

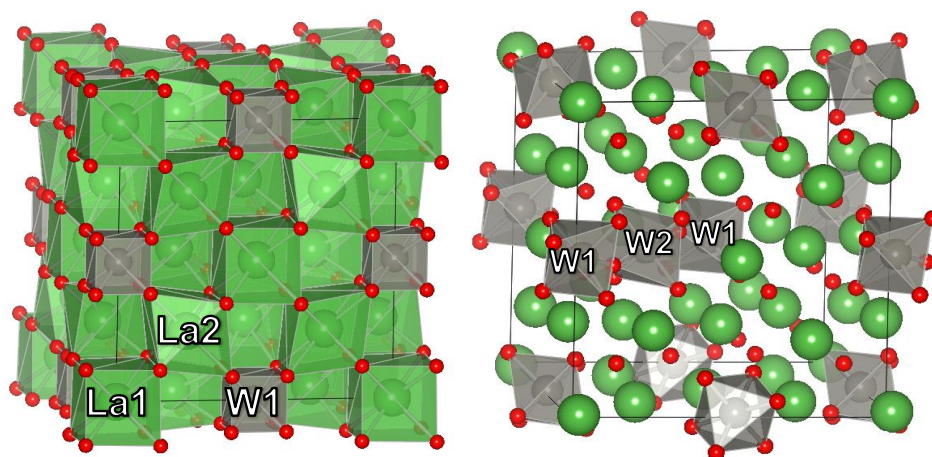

**Figure S2.** (a) High-symmetry averaged structural model where the different polyhedra are drawn and the cation positions are highlighted (W2 can not be detected in the average diffraction techniques, because it can sit in 24 different positions, and can not be located with confidence). (b) A lower symmetry structural model calculated from DFT where the local structure of one possible configuration is drawn. The tungsten polyhedra are drawn, and the different tungsten positions (W1 and W2) are represented. Lanthanum polyhedra have not been drawn, for clarity.

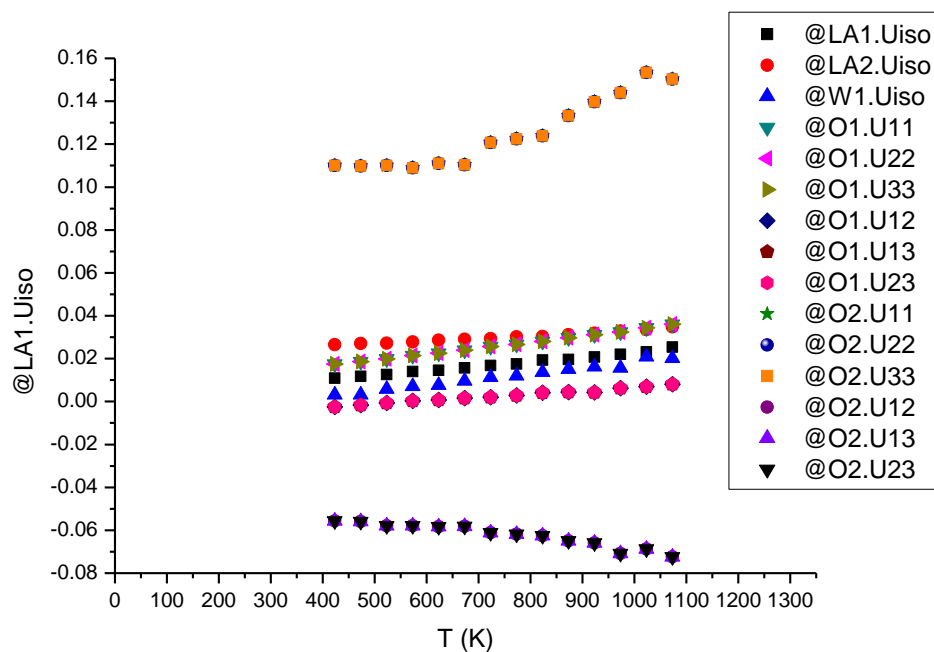

**Figure S3.** Evolution of displacement parameters with temperature in dry Ar using the “simple model” (O2 in 32f position).

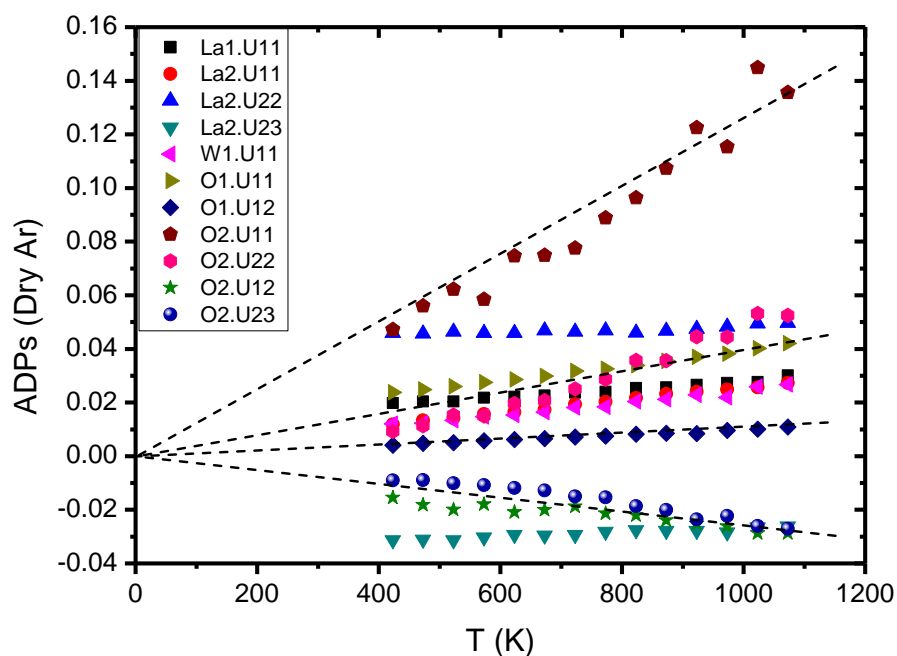

**Figure S4.** Evolution of Uij anisotropic displacement parameters with temperature in dry Ar using the “split model” with O2 in 96k position. Dashed lines are guide to the eye.

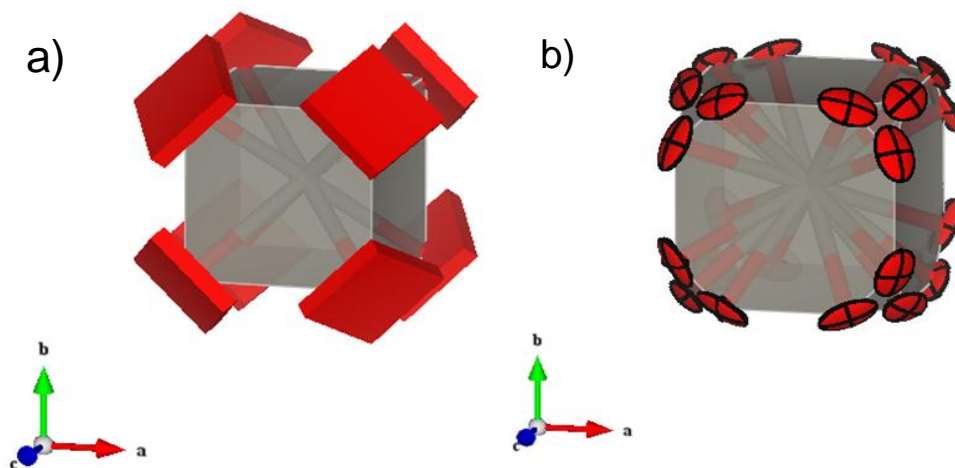

**Figure S5.** Representation of the refined ADPs of oxygens bonded to tungsten in **a)** the “simple model” (O in  $32f$ ) and **b)** “split model” (O in  $96k$ ) at room temperature. Negative mean-square displacements for oxygens in the simple (not split) model are represented by cuboids.

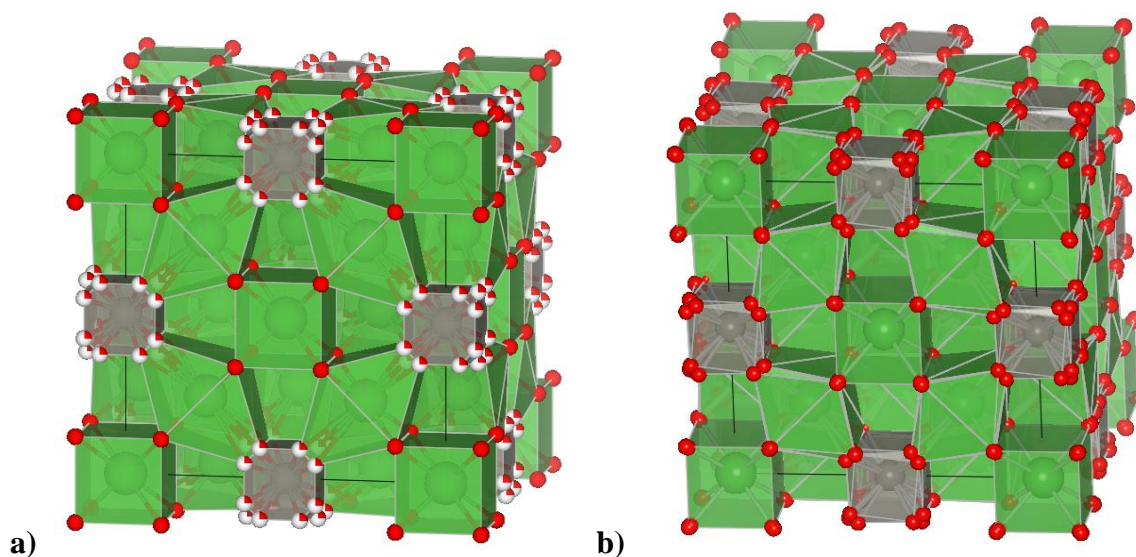

**Figure S6.** **(a)** This is the crystal structural model of  $\text{La}_{28-x}\text{W}_{4+x}\text{O}_{54+3x/2}$  used in the final Rietveld refinements. This is comparable to the model obtained independently from the averaged DFT model **(b)** with relaxed oxygen positions, which generates 3 equivalent O positions around each cube corner.

**Table S3.** La–O distances in dry and wet argon atmosphere at selected temperatures.

Dry Ar

| T (°C) | La1—O1(×8)  | La2—O1(×4) | La2—O2(×4) | La2—O2(×8) |
|--------|-------------|------------|------------|------------|
| 150    | 2.5926 (16) | 2.3696 (4) | 2.313 (3)  | 2.890 (3)  |
| 450    | 2.6059 (17) | 2.3754 (4) | 2.329 (3)  | 2.907 (3)  |
| 750    | 2.6182 (19) | 2.3832 (5) | 2.369 (6)  | 2.917 (4)  |

Wet Ar

| T (°C) | La1—O1(×8)  | La2—O1(×4) | La2—O2(×4) | La2—O2(×8) |
|--------|-------------|------------|------------|------------|
| 150    | 2.5939 (17) | 2.3723 (4) | 2.310 (3)  | 2.895 (3)  |
| 450    | 2.6060 (18) | 2.3788 (5) | 2.325 (3)  | 2.912 (3)  |
| 750    | 2.619 (2)   | 2.3848 (5) | 2.360 (5)  | 2.929 (4)  |

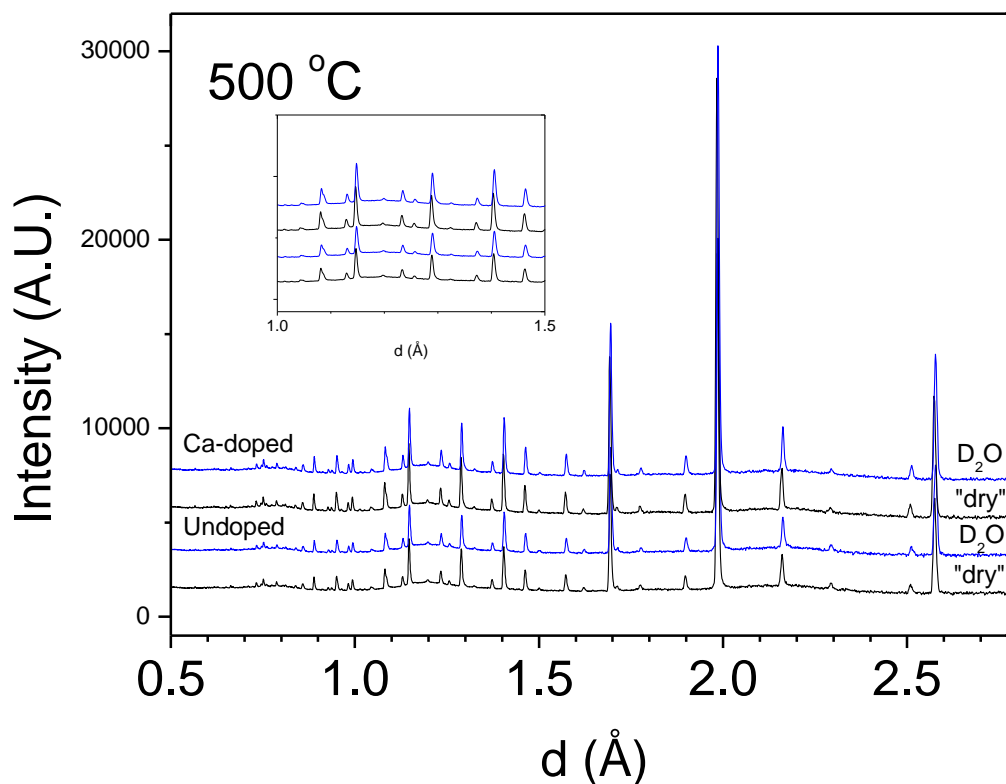

**Figure S7.** Representative ND diffractograms recorded under wet (bubbling through D<sub>2</sub>O) and “dry” (no bubbling through D<sub>2</sub>O) at 500 °C for both Ca-doped and undoped LWO56. It shows that there is essentially no difference between the different conditions and doping levels.

**Table S4.** Atomic coordinates and displacement parameters at **150°C, dry Ar**. Lattice parameter:  $a = 11.183(1) \text{ \AA}$

*Fractional atomic coordinates and equivalent isotropic displacement parameters ( $\text{\AA}^2$ )*

| Atom | x          | y           | z           | Ueq     | Occ.( $<1$ ) |
|------|------------|-------------|-------------|---------|--------------|
| La1  | 0.0        | 0.0         | 0.0         | 0.02016 | 0.95         |
| La2  | 0.0        | 0.25        | 0.25        | 0.0348  |              |
| W1   | 0.5        | 0.5         | 0.5         | 0.01206 |              |
| O1   | 0.13385(8) | 0.13385(8)  | 0.13385(8)  | 0.02372 | 0.193(5)     |
| O2   | 0.4374(3)  | 0.38938(15) | 0.38938(15) | 0.02259 |              |
| W2   | 0.0        | 0.25        | 0.25        | 0.15794 |              |

*Atomic displacement parameters ( $\text{\AA}^2$ )*

| Atom | U11         | U22        | U33        | U12         | U13         | U23        |
|------|-------------|------------|------------|-------------|-------------|------------|
| La1  | 0.0202(6)   | 0.0202(6)  | 0.0202(6)  | 0.0         | 0.0         | 0.0        |
| La2  | 0.0124(10)  | 0.0460(7)  | 0.0460(7)  | 0.0         | 0.0         | -0.0316(8) |
| W1   | 0.0121(8)   | 0.0121(8)  | 0.0121(8)  | 0.0         | 0.0         | 0.0        |
| O1   | 0.0237(4)   | 0.0237(4)  | 0.0237(4)  | 0.0042(4)   | 0.0042(4)   | 0.0042(4)  |
| O2   | 0.049(3)    | 0.0094(12) | 0.0094(12) | -0.0158(10) | -0.0158(10) | -0.0087(9) |
| W2   | -0.0436(18) | 0.26(8)    | 0.26(8)    | 0.0         | 0.0         | -0.25(8)   |

$\chi^2 = 5.108$ ,  $R_p = 0.022$ ,  $R_{wp} = 0.014$ ,  $R_{exp} = 0.006$  for 56 parameters

**Table S5:** Atomic coordinates and displacement parameters at **450 °C, dry Ar**. Lattice parameter:  $a = 11.217(1) \text{ \AA}$

*Fractional atomic coordinates and equivalent isotropic displacement parameters ( $\text{\AA}^2$ )*

| Atom | x          | y           | z           | Ueq     | Occ.( $<1$ ) |
|------|------------|-------------|-------------|---------|--------------|
| La1  | 0.0        | 0.0         | 0.0         | 0.02372 | 0.95         |
| La2  | 0.0        | 0.25        | 0.25        | 0.03739 |              |
| W1   | 0.5        | 0.5         | 0.5         | 0.01814 |              |
| O1   | 0.13412(9) | 0.13412(9)  | 0.13412(9)  | 0.03176 | 0.213(5)     |
| O2   | 0.4383(4)  | 0.39018(17) | 0.39018(17) | 0.04255 |              |
| W2   | 0.0        | 0.25        | 0.25        | 0.06371 |              |

*Atomic displacement parameters ( $\text{\AA}^2$ )*

| Atom | U11         | U22         | U33         | U12         | U13         | U23         |
|------|-------------|-------------|-------------|-------------|-------------|-------------|
| La1  | 0.0237(6)   | 0.0237(6)   | 0.0237(6)   | 0.0         | 0.0         | 0.0         |
| La2  | 0.0194(10)  | 0.0464(7)   | 0.0464(7)   | 0.0         | 0.0         | -0.0294(9)  |
| W1   | 0.0181(9)   | 0.0181(9)   | 0.0181(9)   | 0.0         | 0.0         | 0.0         |
| O1   | 0.03176(28) | 0.03176(28) | 0.03176(28) | 0.0071(4)   | 0.0071(4)   | 0.0071(4)   |
| O2   | 0.078(3)    | 0.0250(16)  | 0.0250(16)  | -0.0188(13) | -0.0188(13) | -0.0150(11) |
| W2   | -0.0419(16) | 0.12(4)     | 0.12(4)     | 0.0         | 0.0         | -0.10(4)    |

$\chi^2 = 1.716$ ,  $R_p = 0.022$ ,  $R_{wp} = 0.011$ ,  $R_{exp} = 0.008$  for 56 parameters



**Table S6.** Atomic coordinates and displacement parameters at **750°C, dry Ar**. Lattice parameter:  $a = 11.258(1) \text{ \AA}$

*Fractional atomic coordinates and equivalent isotropic displacement parameters ( $\text{\AA}^2$ )*

| Atom | <i>x</i>    | <i>y</i>    | <i>z</i>    | <i>U</i> <sub>eq</sub> | Occ.( $<1$ ) |
|------|-------------|-------------|-------------|------------------------|--------------|
| La1  | 0.0         | 0.0         | 0.0         | 0.0277                 |              |
| La2  | 0.0         | 0.25        | 0.25        | 0.04148                | 0.95         |
| W1   | 0.5         | 0.5         | 0.5         | 0.02594                |              |
| O1   | 0.13427(10) | 0.13427(10) | 0.13427(10) | 0.04014                |              |
| O2   | 0.4378(6)   | 0.3922(3)   | 0.3922(3)   | 0.08367                | 0.250(6)     |
| W2   | 0.0         | 0.25        | 0.25        | 0.05837                | 0.05         |

*Atomic displacement parameters ( $\text{\AA}^2$ )*

| Atom | <i>U</i> <sub>11</sub> | <i>U</i> <sub>22</sub> | <i>U</i> <sub>33</sub> | <i>U</i> <sub>12</sub> | <i>U</i> <sub>13</sub> | <i>U</i> <sub>23</sub> |
|------|------------------------|------------------------|------------------------|------------------------|------------------------|------------------------|
| La1  | 0.0277(6)              | 0.0277(6)              | 0.0277(6)              | 0.0                    | 0.0                    | 0.0                    |
| La2  | 0.0256(11)             | 0.0494(9)              | 0.0494(9)              | 0.0                    | 0.0                    | −0.0266(10)            |
| W1   | 0.0259(11)             | 0.0259(11)             | 0.0259(11)             | 0.0                    | 0.0                    | 0.0                    |
| O1   | 0.04014(31)            | 0.04014(31)            | 0.04014(31)            | 0.0100(5)              | 0.0100(5)              | 0.0100(5)              |
| O2   | 0.145(8)               | 0.053(3)               | 0.053(3)               | −0.029(3)              | −0.029(3)              | −0.0261(15)            |
| W2   | −0.037(3)              | 0.11(4)                | 0.11(4)                | 0.0                    | 0.0                    | −0.10(4)               |

$\chi^2 = 1.103$ ,  $R_p = 0.018$ ,  $R_{wp} = 0.009$ ,  $R_{exp} = 0.008$  for 56 parameters

**Table S7.** Atomic coordinates and displacement parameters at **150°C, wet Ar**. Lattice parameter:  $a = 11.194(1) \text{ \AA}$

*Fractional atomic coordinates and equivalent isotropic displacement parameters ( $\text{\AA}^2$ )*

| Atom | <i>x</i>   | <i>y</i>    | <i>z</i>    | <i>U</i> <sub>eq</sub> | Occ.( $<1$ ) |
|------|------------|-------------|-------------|------------------------|--------------|
| La1  | 0.0        | 0.0         | 0.0         | 0.01993                |              |
| La2  | 0.0        | 0.25        | 0.25        | 0.03633                | 0.95         |
| W1   | 0.5        | 0.5         | 0.5         | 0.01134                |              |
| O1   | 0.13378(9) | 0.13378(9)  | 0.13378(9)  | 0.02346                |              |
| O2   | 0.4377(3)  | 0.38912(16) | 0.38912(16) | 0.02247                | 0.188(5)     |
| W2   | 0.0        | 0.25        | 0.25        | 0.20251                | 0.05         |

*Atomic displacement parameters ( $\text{\AA}^2$ )*

| Atom | <i>U</i> <sub>11</sub> | <i>U</i> <sub>22</sub> | <i>U</i> <sub>33</sub> | <i>U</i> <sub>12</sub> | <i>U</i> <sub>13</sub> | <i>U</i> <sub>23</sub> |
|------|------------------------|------------------------|------------------------|------------------------|------------------------|------------------------|
| La1  | 0.0199(7)              | 0.0199(7)              | 0.0199(7)              | 0.0                    | 0.0                    | 0.0                    |
| La2  | 0.0124(11)             | 0.0483(8)              | 0.0483(8)              | 0.0                    | 0.0                    | −0.0340(9)             |
| W1   | 0.0113(8)              | 0.0113(8)              | 0.0113(8)              | 0.0                    | 0.0                    | 0.0                    |
| O1   | 0.0235(4)              | 0.0235(4)              | 0.0235(4)              | 0.0047(4)              | 0.0047(4)              | 0.0047(4)              |
| O2   | 0.050(3)               | 0.0089(13)             | 0.0089(13)             | −0.0178(11)            | −0.0178(11)            | −0.0101(9)             |
| W2   | −0.0449(19)            | 0.33(10)               | 0.33(10)               | 0.0                    | 0.0                    | −0.31(10)              |

$\chi^2 = 3.610$ ,  $R_p = 0.023$ ,  $R_{wp} = 0.014$ ,  $R_{exp} = 0.008$  for 56 parameters

**Table S8.** Atomic coordinates and displacement parameters at **450°C, wet Ar**. Lattice parameter:  $a = 11.230(1) \text{ \AA}$

*Fractional atomic coordinates and equivalent isotropic displacement parameters ( $\text{\AA}^2$ )*

| Atom | <i>x</i>   | <i>y</i>    | <i>z</i>    | <i>U</i> <sub>eq</sub> | Occ.( $<1$ ) |
|------|------------|-------------|-------------|------------------------|--------------|
| La1  | 0.0        | 0.0         | 0.0         | 0.0248                 |              |
| La2  | 0.0        | 0.25        | 0.25        | 0.04099                | 0.95         |
| W1   | 0.5        | 0.5         | 0.5         | 0.01765                |              |
| O1   | 0.13398(9) | 0.13398(9)  | 0.13398(9)  | 0.03218                |              |
| O2   | 0.4386(4)  | 0.38983(17) | 0.38983(17) | 0.04054                | 0.205(5)     |
| W2   | 0.0        | 0.25        | 0.25        | 0.04761                | 0.05         |

*Atomic displacement parameters ( $\text{\AA}^2$ )*

| Atom | <i>U</i> <sub>11</sub> | <i>U</i> <sub>22</sub> | <i>U</i> <sub>33</sub> | <i>U</i> <sub>12</sub> | <i>U</i> <sub>13</sub> | <i>U</i> <sub>23</sub> |
|------|------------------------|------------------------|------------------------|------------------------|------------------------|------------------------|
| La1  | 0.0248(6)              | 0.0248(6)              | 0.0248(6)              | 0.0                    | 0.0                    | 0.0                    |
| La2  | 0.0217(11)             | 0.0506(9)              | 0.0506(9)              | 0.0                    | 0.0                    | −0.0328(11)            |
| W1   | 0.0176(9)              | 0.0176(9)              | 0.0176(9)              | 0.0                    | 0.0                    | 0.0                    |
| O1   | 0.03218(30)            | 0.03218(30)            | 0.03218(30)            | 0.0077(4)              | 0.0077(4)              | 0.0077(4)              |
| O2   | 0.077(4)               | 0.0222(17)             | 0.0222(17)             | −0.0198(13)            | −0.0198(13)            | −0.0157(11)            |
| W2   | −0.039(2)              | 0.09(4)                | 0.09(4)                | 0.0                    | 0.0                    | −0.08(4)               |

$\chi^2 = 1.716$ ,  $R_p = 0.022$ ,  $R_{wp} = 0.011$ ,  $R_{exp} = 0.008$  for 56 parameters

**Table S9.** Atomic coordinates and displacement parameters at **750°C, wet Ar**. Lattice parameter:  $a = 11.230(1) \text{ \AA}$

*Fractional atomic coordinates and equivalent isotropic displacement parameters ( $\text{\AA}^2$ )*

| Atom | <i>x</i>    | <i>y</i>    | <i>z</i>    | <i>U</i> <sub>eq</sub> | Occ.( $<1$ ) |
|------|-------------|-------------|-------------|------------------------|--------------|
| La1  | 0.0         | 0.0         | 0.0         | 0.02873                |              |
| La2  | 0.0         | 0.25        | 0.25        | 0.04222                | 0.95         |
| W1   | 0.5         | 0.5         | 0.5         | 0.02641                |              |
| O1   | 0.13423(10) | 0.13423(10) | 0.13423(10) | 0.03985                |              |
| O2   | 0.4392(5)   | 0.3918(3)   | 0.3918(3)   | 0.08536                | 0.270(6)     |
| W2   | 0.0         | 0.25        | 0.25        | 0.04907                | 0.05         |

*Atomic displacement parameters ( $\text{\AA}^2$ )*

| Atom | <i>U</i> <sub>11</sub> | <i>U</i> <sub>22</sub> | <i>U</i> <sub>33</sub> | <i>U</i> <sub>12</sub> | <i>U</i> <sub>13</sub> | <i>U</i> <sub>23</sub> |
|------|------------------------|------------------------|------------------------|------------------------|------------------------|------------------------|
| La1  | 0.0287(7)              | 0.0287(7)              | 0.0287(7)              | 0.0                    | 0.0                    | 0.0                    |
| La2  | 0.0270(12)             | 0.0498(10)             | 0.0498(10)             | 0.0                    | 0.0                    | −0.0274(10)            |
| W1   | 0.0264(12)             | 0.0264(12)             | 0.0264(12)             | 0.0                    | 0.0                    | 0.0                    |
| O1   | 0.03985(33)            | 0.03985(33)            | 0.03985(33)            | 0.0093(5)              | 0.0093(5)              | 0.0093(5)              |
| O2   | 0.150(8)               | 0.053(3)               | 0.053(3)               | −0.024(3)              | −0.024(3)              | −0.0286(15)            |
| W2   | −0.037(3)              | 0.09(4)                | 0.09(4)                | 0.0                    | 0.0                    | −0.09(4)               |

$\chi^2 = 1.188$ ,  $R_p = 0.019$ ,  $R_{wp} = 0.009$ ,  $R_{exp} = 0.008$  for 56 parameters
